# Supplementary material for: Preclassification of Broadband and Sparse Infrared Data by Multiplicative Signal Correction Approach
Source: MDPI journal article supplement (doi:10.3390/molecules27072298), 2022-04-01
Supplement: s1 [file s1]

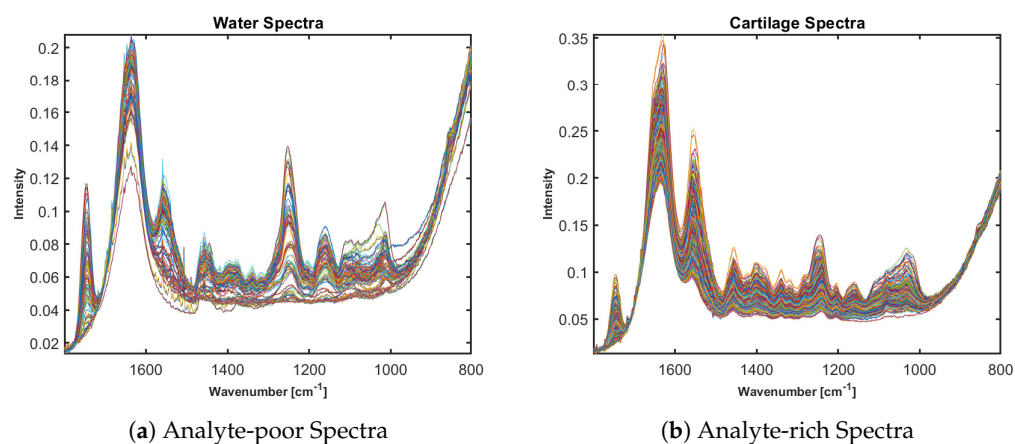

(a) Analyte-poor Spectra (b) Analyte-rich Spectra  
**Figure S1.** Visual presentation of broadband spectrum after using MSC preclassification approach (Collagen as reference spectrum), (a) Water/Analyte-poor Spectra (b) Cartilage/Analyte-rich Spectra.

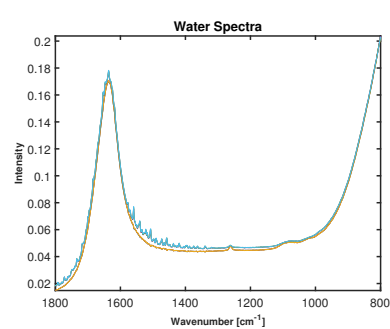

(a) Analyte-poor Spectra

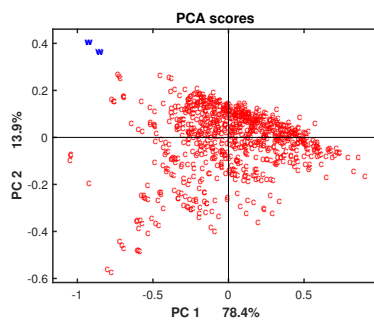

(b) PCA

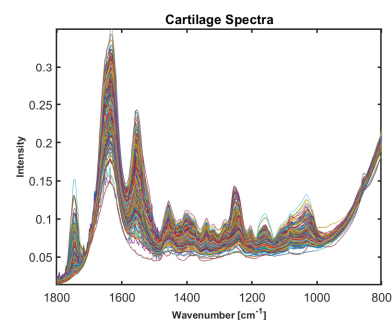

(c) Analyte-rich Spectra

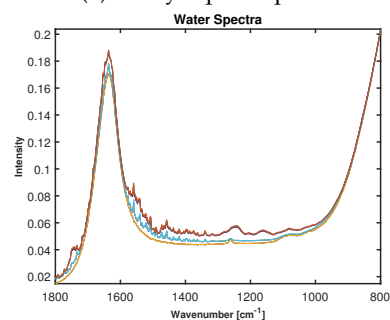

(d) Analyte-poor Spectra

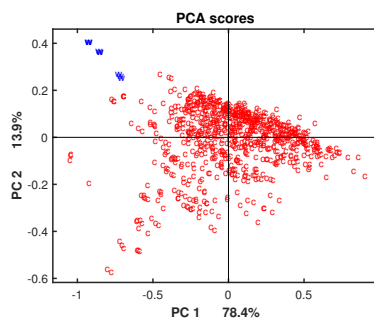

(e) PCA

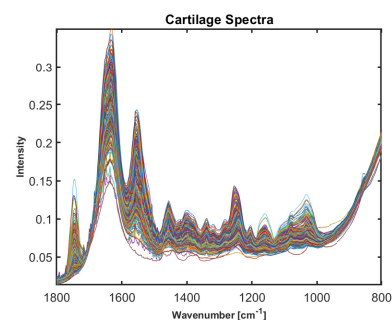

(f) Analyte-rich Spectra

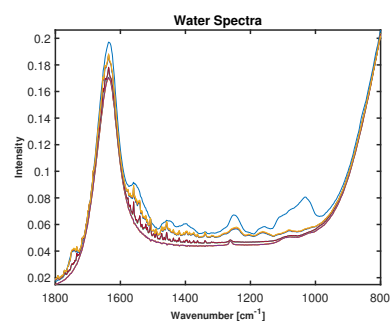

(g) Analyte-poor Spectra

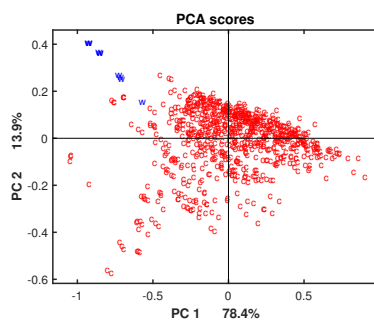

(h) PCA

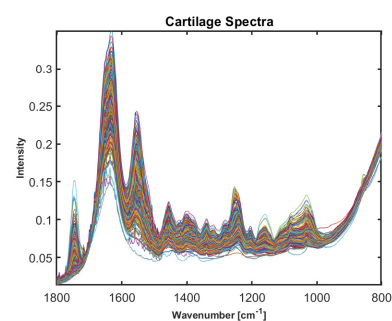

(i) Analyte-rich Spectra

**Figure S2.** Visual presentation of Human 12 (set 2) broadband spectra after using MSC preclassification approach, (a,d,g) Water/Analyte-poor Spectra (c,f,i) Cartilage/Analyte-rich Spectra and (b,e,h) are PCA scores obtained by different *RMSE* thresholds, 0.1 for (b), 0.2 for (c) and 0.22 for (h). c and w in PCA scores correspond to cartilage and water spectrum.

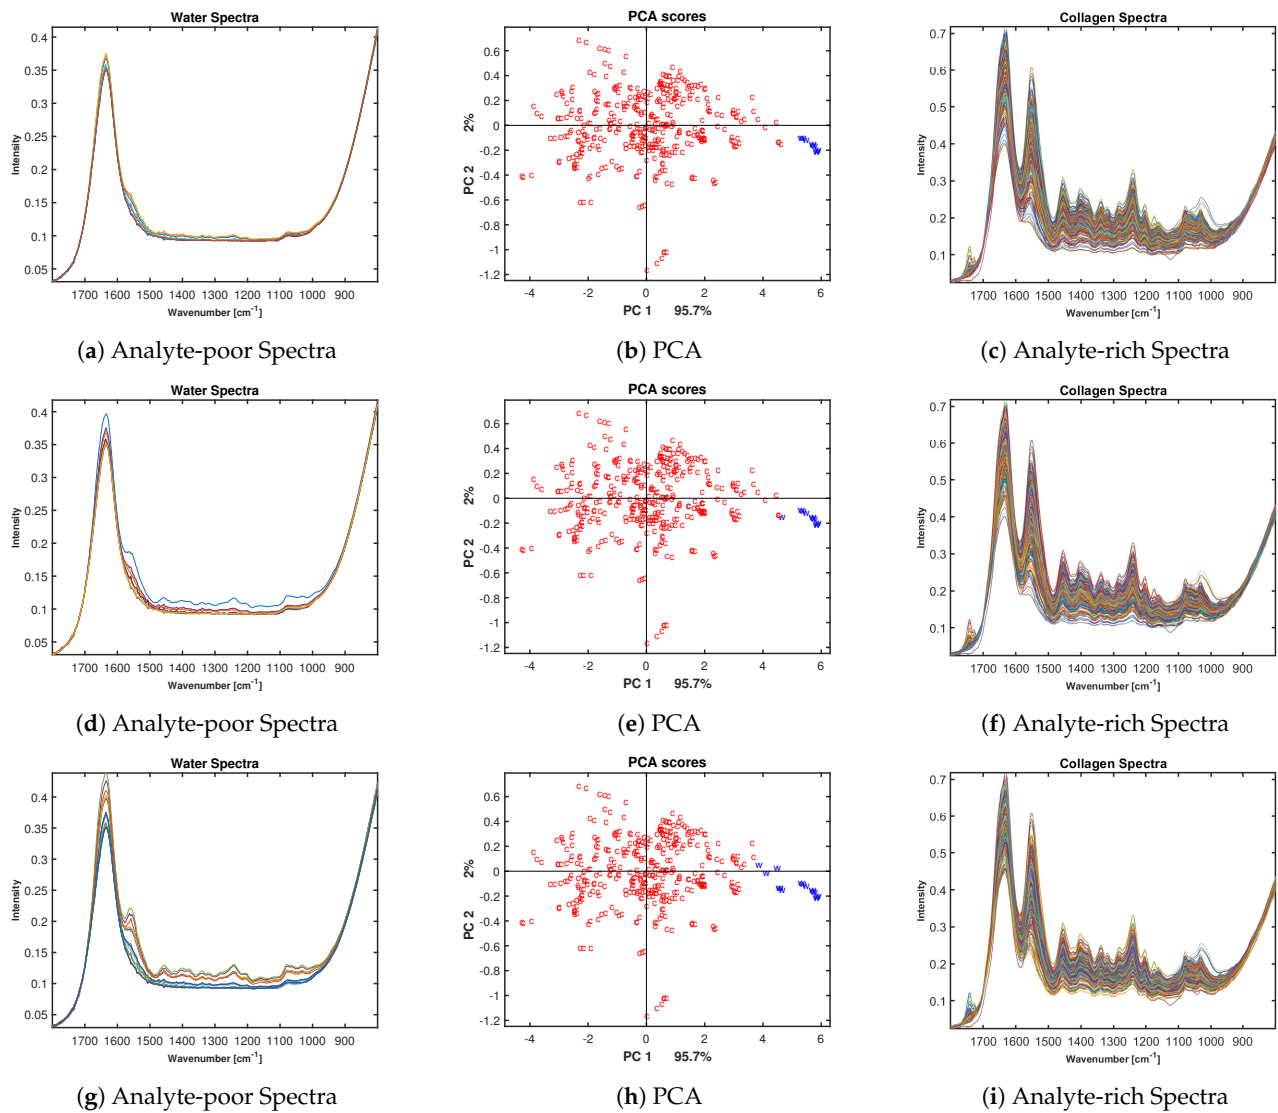

**Figure S3.** Visual presentation of Bovine (set 3) broadband spectra after using MSC preclassification approach, (a,d,g) Water/Analyte-poor Spectra (c,f,i) Cartilage/Analyte-rich Spectra and (b,e,h) are PCA scores obtained by different RMSE thresholds, 0.5 for (b), 0.6 for (c) and 0.12 for (h). c and w in PCA scores correspond to cartilage and water spectrum.
